# Supplementary material
Source: publisher site journal article supplement (https://www.dovepress.com/article/215006)
Supplement: Supplementary file 1 [file get_supplementary_file.php]

1 ORIGINAL RESEARCH - **Supplementary data**

2 Different effects of amniotic membrane homogenate on bacterial growth

3 Šket T et al

4 **Different effects of amniotic membrane homogenate on the**  
5 **growth of uropathogenic *Escherichia coli*, *Staphylococcus***  
6 ***aureus* and *Serratia marcescens***

7 Tina Šket<sup>1</sup>, Taja Železnik Ramuta<sup>1</sup>, Marjanca Starčič Erjavec<sup>2</sup>, Mateja Erdani Kreft<sup>1</sup>

8

9 <sup>1</sup> Institute of Cell Biology, Faculty of Medicine, University of Ljubljana, Ljubljana, Slovenia

10 <sup>2</sup> Department of Biology, Biotechnical Faculty, University of Ljubljana, Ljubljana, Slovenia

11

12 **ORCID numbers**

13 Tina Šket: 0000-0003-0050-6629

14 Taja Železnik Ramuta: 0000-0003-3672-7159

15 Marjanca Starčič Erjavec: 0000-0003-0200-573X

16 Mateja Erdani Kreft: 0000-0001-6486-165X

17

18 **Correspondence:**

19 Prof. Mateja Erdani Kreft, PhD

20 University of Ljubljana, Faculty of Medicine

21 Institute of Cell Biology

22 Vrazov trg 2

23 SI-1000 Ljubljana, Slovenia

24 Tel. +386 1 543 76 85

25 Fax. +386 1 543 76 81

26 E-mail: mateja.erdani@mf.uni-lj.si

27 ORCID: 0000-0001-6486-165X

28

## 29 Supplementary data

30

31 **Supplementary Table 1** Complete results of one-way ANOVA analysis that compared the effect of  
 32 saline (0.9% NaCl), PBS and different dilutions of AM homogenate (undiluted H1, 2-fold diluted H2, 4-  
 33 fold diluted H3) on bacterial growth. The values in green represent statistically significant data  
 34 ( $p < 0.05$ ).

35 **Abbreviations:** H1, undiluted AM homogenate; H2, 2-fold diluted AM homogenate; H3, 4-fold diluted  
 36 AM homogenate.

37 **Note:** The statistically significant values for UPEC at t=0 h are visible in the case of added gentamicin,  
 38 which had an immediate effect on the bacterial cells and thus on CFU/ml.

| t [h] | Pairwise comparison       | UPEC p-value | <i>S. aureus</i> p-value | <i>S. marcescens</i> p-value |
|-------|---------------------------|--------------|--------------------------|------------------------------|
| 0     | 0.9 % NaCl vs. gentamicin | 0,0067       | 0,41                     | 0,6735                       |
| 0     | 0.9 % NaCl vs. H1         | 0,9585       | 0,9902                   | 0,9935                       |
| 0     | 0.9 % NaCl vs. H2         | 0,9018       | 0,9943                   | 0,981                        |
| 0     | 0.9 % NaCl vs. H3         | > 0,9999     | 0,9346                   | 0,9586                       |
| 0     | 0.9 % NaCl vs. PBS        | 0,3824       | > 0,9999                 | 0,9913                       |
| 0     | H1 vs. gentamicin         | 0,0132       | 0,1824                   | 0,8407                       |
| 0     | H1 vs. H2                 | 0,9998       | 0,8704                   | > 0,9999                     |
| 0     | H1 vs. H3                 | 0,9908       | 0,6694                   | 0,9988                       |
| 0     | H2 vs. gentamicin         | 0,03         | 0,6983                   | 0,9067                       |
| 0     | H2 vs. H3                 | 0,9641       | 0,9984                   | > 0,9999                     |
| 0     | H3 vs. gentamicin         | 0,0104       | 0,8903                   | 0,9714                       |
| 0     | PBS vs. gentamicin        | 0,1279       | 0,4176                   | 0,8586                       |
| 0     | PBS vs. H1                | 0,7522       | 0,989                    | > 0,9999                     |
| 0     | PBS vs. H2                | 0,9101       | 0,995                    | > 0,9999                     |
| 0     | PBS vs. H3                | 0,5162       | 0,9387                   | 0,9993                       |
| 1     | 0.9 % NaCl vs. gentamicin | < 0,0001     | < 0,0001                 | < 0,0001                     |
| 1     | 0.9 % NaCl vs. H1         | 0,3987       | 0,0021                   | 0,9237                       |
| 1     | 0.9 % NaCl vs. H2         | 0,4603       | 0,0015                   | 0,9707                       |
| 1     | 0.9 % NaCl vs. H3         | 0,6601       | 0,0062                   | 0,781                        |
| 1     | 0.9 % NaCl vs. PBS        | 0,957        | 0,9988                   | > 0,9999                     |
| 1     | H1 vs. gentamicin         | < 0,0001     | < 0,0001                 | < 0,0001                     |
| 1     | H1 vs. H2                 | > 0,9999     | 0,9999                   | 0,9998                       |
| 1     | H1 vs. H3                 | 0,9997       | 0,9833                   | 0,9967                       |
| 1     | H2 vs. gentamicin         | < 0,0001     | < 0,0001                 | < 0,0001                     |
| 1     | H2 vs. H3                 | 0,9999       | 0,9401                   | 0,9795                       |
| 1     | H3 vs. gentamicin         | < 0,0001     | < 0,0001                 | < 0,0001                     |
| 1     | PBS vs. gentamicin        | < 0,0001     | < 0,0001                 | < 0,0001                     |
| 1     | PBS vs. H1                | 0,0467       | 0,0039                   | 0,774                        |
| 1     | PBS vs. H2                | 0,0706       | 0,0026                   | 0,8874                       |
| 1     | PBS vs. H3                | 0,1707       | 0,0115                   | 0,5641                       |

| t [h] | Pairwise comparison       | UPEC p-value | <i>S. aureus</i> p-value | <i>S. marcescens</i> p-value |
|-------|---------------------------|--------------|--------------------------|------------------------------|
| 2     | 0.9 % NaCl vs. gentamicin | < 0,0001     | < 0,0001                 | < 0,0001                     |
| 2     | 0.9 % NaCl vs. H1         | < 0,0001     | < 0,0001                 | 0,9916                       |
| 2     | 0.9 % NaCl vs. H2         | < 0,0001     | < 0,0001                 | 0,7517                       |
| 2     | 0.9 % NaCl vs. H3         | < 0,0001     | < 0,0001                 | 0,4512                       |
| 2     | 0.9 % NaCl vs. PBS        | > 0,9999     | 0,339                    | 0,9858                       |
| 2     | H1 vs. gentamicin         | < 0,0001     | < 0,0001                 | < 0,0001                     |
| 2     | H1 vs. H2                 | 0,9973       | 0,9998                   | 0,9228                       |
| 2     | H1 vs. H3                 | 0,9986       | > 0,9999                 | 0,6101                       |
| 2     | H2 vs. gentamicin         | < 0,0001     | < 0,0001                 | < 0,0001                     |
| 2     | H2 vs. H3                 | 0,9697       | 0,997                    | 0,9772                       |
| 2     | H3 vs. gentamicin         | < 0,0001     | < 0,0001                 | < 0,0001                     |
| 2     | PBS vs. gentamicin        | < 0,0001     | < 0,0001                 | < 0,0001                     |
| 2     | PBS vs. H1                | < 0,0001     | 0,0016                   | 0,6814                       |
| 2     | PBS vs. H2                | < 0,0001     | 0,0011                   | 0,2071                       |
| 2     | PBS vs. H3                | < 0,0001     | 0,0022                   | 0,0861                       |
| 3     | 0.9 % NaCl vs. gentamicin | < 0,0001     | < 0,0001                 | < 0,0001                     |
| 3     | 0.9 % NaCl vs. H1         | < 0,0001     | < 0,0001                 | 0,5422                       |
| 3     | 0.9 % NaCl vs. H2         | < 0,0001     | < 0,0001                 | 0,8041                       |
| 3     | 0.9 % NaCl vs. H3         | < 0,0001     | < 0,0001                 | 0,7934                       |
| 3     | 0.9 % NaCl vs. PBS        | > 0,9999     | 0,9999                   | 0,9857                       |
| 3     | H1 vs. gentamicin         | < 0,0001     | < 0,0001                 | < 0,0001                     |
| 3     | H1 vs. H2                 | 0,9997       | 0,9997                   | 0,9915                       |
| 3     | H1 vs. H3                 | 0,9982       | 0,9807                   | 0,9978                       |
| 3     | H2 vs. gentamicin         | < 0,0001     | < 0,0001                 | < 0,0001                     |
| 3     | H2 vs. H3                 | > 0,9999     | 0,9227                   | > 0,9999                     |
| 3     | H3 vs. gentamicin         | < 0,0001     | < 0,0001                 | < 0,0001                     |
| 3     | PBS vs. gentamicin        | < 0,0001     | < 0,0001                 | < 0,0001                     |
| 3     | PBS vs. H1                | < 0,0001     | < 0,0001                 | 0,0993                       |
| 3     | PBS vs. H2                | < 0,0001     | < 0,0001                 | 0,2492                       |
| 3     | PBS vs. H3                | < 0,0001     | < 0,0001                 | 0,276                        |
| 4     | 0.9 % NaCl vs. gentamicin | < 0,0001     | < 0,0001                 | < 0,0001                     |
| 4     | 0.9 % NaCl vs. H1         | < 0,0001     | < 0,0001                 | 0,8774                       |
| 4     | 0.9 % NaCl vs. H2         | < 0,0001     | < 0,0001                 | 0,9686                       |
| 4     | 0.9 % NaCl vs. H3         | < 0,0001     | < 0,0001                 | 0,9976                       |
| 4     | 0.9 % NaCl vs. PBS        | 0,9928       | 0,9998                   | 0,9998                       |
| 4     | H1 vs. gentamicin         | < 0,0001     | < 0,0001                 | < 0,0001                     |
| 4     | H1 vs. H2                 | > 0,9999     | > 0,9999                 | 0,9985                       |
| 4     | H1 vs. H3                 | 0,9997       | 0,7943                   | 0,9767                       |
| 4     | H2 vs. gentamicin         | < 0,0001     | < 0,0001                 | < 0,0001                     |
| 4     | H2 vs. H3                 | > 0,9999     | 0,8093                   | 0,9991                       |
| 4     | H3 vs. gentamicin         | < 0,0001     | < 0,0001                 | < 0,0001                     |
| 4     | PBS vs. gentamicin        | < 0,0001     | < 0,0001                 | < 0,0001                     |
| 4     | PBS vs. H1                | < 0,0001     | < 0,0001                 | 0,5798                       |
| 4     | PBS vs. H2                | < 0,0001     | < 0,0001                 | 0,8009                       |
| 4     | PBS vs. H3                | < 0,0001     | < 0,0001                 | 0,9598                       |

| t [h] | Pairwise comparison       | UPEC p-value | <i>S. aureus</i> p-value | <i>S. marcescens</i> p-value |
|-------|---------------------------|--------------|--------------------------|------------------------------|
| 5     | 0.9 % NaCl vs. gentamicin | < 0,0001     | < 0,0001                 | < 0,0001                     |
| 5     | 0.9 % NaCl vs. H1         | < 0,0001     | < 0,0001                 | 0,0015                       |
| 5     | 0.9 % NaCl vs. H2         | < 0,0001     | < 0,0001                 | 0,0546                       |
| 5     | 0.9 % NaCl vs. H3         | < 0,0001     | < 0,0001                 | 0,0405                       |
| 5     | 0.9 % NaCl vs. PBS        | > 0,9999     | 0,9996                   | 0,9988                       |
| 5     | H1 vs. gentamicin         | < 0,0001     | < 0,0001                 | < 0,0001                     |
| 5     | H1 vs. H2                 | > 0,9999     | 0,9995                   | 0,2105                       |
| 5     | H1 vs. H3                 | > 0,9999     | 0,9                      | 0,4654                       |
| 5     | H2 vs. gentamicin         | < 0,0001     | < 0,0001                 | < 0,0001                     |
| 5     | H2 vs. H3                 | > 0,9999     | 0,9757                   | 0,9985                       |
| 5     | H3 vs. gentamicin         | < 0,0001     | < 0,0001                 | < 0,0001                     |
| 5     | PBS vs. gentamicin        | < 0,0001     | < 0,0001                 | < 0,0001                     |
| 5     | PBS vs. H1                | < 0,0001     | < 0,0001                 | < 0,0001                     |
| 5     | PBS vs. H2                | < 0,0001     | < 0,0001                 | 0,0063                       |
| 5     | PBS vs. H3                | < 0,0001     | < 0,0001                 | 0,0055                       |
| 6     | 0.9 % NaCl vs. gentamicin | < 0,0001     | < 0,0001                 | < 0,0001                     |
| 6     | 0.9 % NaCl vs. H1         | < 0,0001     | 0,0001                   | 0,0859                       |
| 6     | 0.9 % NaCl vs. H2         | < 0,0001     | < 0,0001                 | 0,1429                       |
| 6     | 0.9 % NaCl vs. H3         | < 0,0001     | < 0,0001                 | 0,0891                       |
| 6     | 0.9 % NaCl vs. PBS        | > 0,9999     | 0,9989                   | 0,965                        |
| 6     | H1 vs. gentamicin         | < 0,0001     | < 0,0001                 | < 0,0001                     |
| 6     | H1 vs. H2                 | 0,9995       | 0,8687                   | 0,9989                       |
| 6     | H1 vs. H3                 | 0,9814       | 0,1999                   | > 0,9999                     |
| 6     | H2 vs. gentamicin         | < 0,0001     | < 0,0001                 | < 0,0001                     |
| 6     | H2 vs. H3                 | 0,9326       | 0,7343                   | 0,9954                       |
| 6     | H3 vs. gentamicin         | < 0,0001     | < 0,0001                 | < 0,0001                     |
| 6     | PBS vs. gentamicin        | < 0,0001     | < 0,0001                 | < 0,0001                     |
| 6     | PBS vs. H1                | < 0,0001     | 0,0002                   | 0,1422                       |
| 6     | PBS vs. H2                | < 0,0001     | < 0,0001                 | 0,2534                       |
| 6     | PBS vs. H3                | < 0,0001     | < 0,0001                 | 0,1522                       |
| 7     | 0.9 % NaCl vs. gentamicin | < 0,0001     | < 0,0001                 | < 0,0001                     |
| 7     | 0.9 % NaCl vs. H1         | < 0,0001     | 0,0006                   | 0,9954                       |
| 7     | 0.9 % NaCl vs. H2         | < 0,0001     | 0,0002                   | 0,9979                       |
| 7     | 0.9 % NaCl vs. H3         | < 0,0001     | < 0,0001                 | 0,9957                       |
| 7     | 0.9 % NaCl vs. PBS        | 0,9785       | > 0,9999                 | 0,9988                       |
| 7     | H1 vs. gentamicin         | < 0,0001     | < 0,0001                 | < 0,0001                     |
| 7     | H1 vs. H2                 | 0,8573       | 0,9863                   | > 0,9999                     |
| 7     | H1 vs. H3                 | > 0,9999     | 0,2397                   | 0,8514                       |
| 7     | H2 vs. gentamicin         | < 0,0001     | < 0,0001                 | < 0,0001                     |
| 7     | H2 vs. H3                 | 0,8452       | 0,5329                   | 0,8871                       |
| 7     | H3 vs. gentamicin         | < 0,0001     | < 0,0001                 | < 0,0001                     |
| 7     | PBS vs. gentamicin        | < 0,0001     | < 0,0001                 | < 0,0001                     |
| 7     | PBS vs. H1                | < 0,0001     | 0,0005                   | > 0,9999                     |
| 7     | PBS vs. H2                | < 0,0001     | 0,0002                   | > 0,9999                     |
| 7     | PBS vs. H3                | < 0,0001     | < 0,0001                 | 0,9051                       |

39 **Supplementary Table 2** Complete results of one-way ANOVA analysis that compared the growth of  
 40 *S. marcescens* in Mueller-Hinton broth, undiluted AM homogenate, 2- fold and 4-fold diluted AM  
 41 homogenate and PBS. The values in green represent statistically significant data (p<0.05).  
 42 **Abbreviations:** MHM, Mueller-Hinton broth; H1, undiluted AM homogenate; H2, 2-fold diluted AM  
 43 homogenate; H3, 4-fold diluted AM homogenate.

| t [h] | Pairwise comparison | p-value            |
|-------|---------------------|--------------------|
| 0     | MHM vs. H1          | 0,9978             |
| 0     | MHM vs. H2          | > 0,9999           |
| 0     | MHM vs. H3          | 0,9974             |
| 0     | MHM vs. PBS         | 0,9000             |
| 0     | H1 vs. H2           | 0,9998             |
| 0     | H1 vs. H3           | 0,9675             |
| 0     | H1 vs. PBS          | 0,7777             |
| 0     | H2 vs. H3           | 0,9903             |
| 0     | H2 vs. PBS          | 0,8529             |
| 0     | H3 vs. PBS          | 0,9729             |
| 7     | MHM vs. H1          | 0,2953             |
| 7     | MHM vs. H2          | <b>0,0029</b>      |
| 7     | MHM vs. H3          | <b>0,0049</b>      |
| 7     | MHM vs. PBS         | <b>&lt; 0,0001</b> |
| 7     | H1 vs. H2           | 0,1695             |
| 7     | H1 vs. H3           | 0,2552             |
| 7     | H1 vs. PBS          | <b>0,0004</b>      |
| 7     | H2 vs. H3           | 0,9991             |
| 7     | H2 vs. PBS          | <b>0,0311</b>      |
| 7     | H3 vs. PBS          | <b>0,0199</b>      |

44

45

46

47

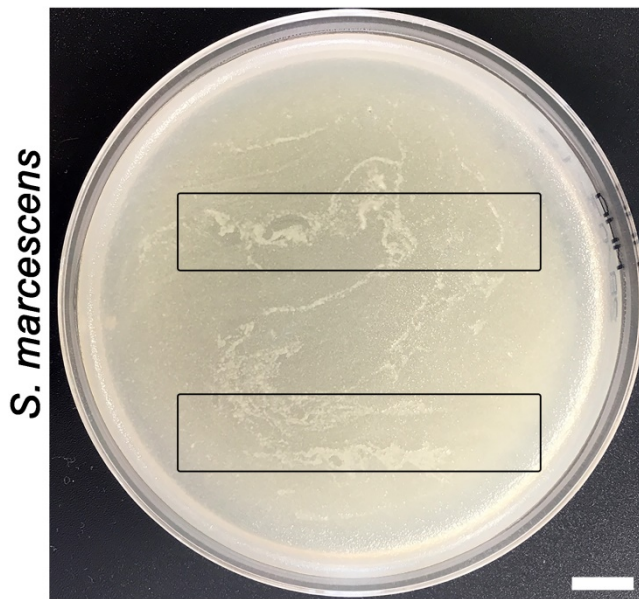

48

49 **Supplementary Figure 1** A clinical strain of *S. marcescens* was tested to observe, if its growth is at all  
50 inhibited by AM homogenate (H1, its preparation is described in Materials and Methods, chapter  
51 Amniotic membrane homogenate preparation). No zones of inhibition were detected, suggesting that  
52 the resistance against growth inhibitory compounds of AM is species-specific. Muller-Hinton soft agar  
53 was first cooked at 100°C, cooled to 48°C, inoculated with 100 µl of overnight culture of *S.*  
54 *marcescens* and poured over the Muller-Hinton agar plate. After 15 minutes of incubation at room  
55 temperature, 3-times of 5 µl (top row) and 3-times of 10 µl (bottom row) of AM homogenates were  
56 placed on the agar plate and incubated at 37°C for 24 hours. Frames mark positions of AM  
57 homogenates. Scale bar: 10 mm.

58

59
